# Supplementary material
Source: PubMed Central journal article supplement (PMC4446416)
Supplement: supp_gkv180_nar-03551-met-n-2014-File007.pdf [file supp_gkv180_nar-03551-met-n-2014-File007.pdf]

**Supplementary Table 1. Summary of the synthetic metagenomes used in this study.**

| Dataset | Designation | Complexity | Coverage | # of species | Error Model Basis | Read Distribution | Total # of Reads | Mean Read Length (bp) | Total Input Bases (bp) | Accuracy |
|---------|-------------|------------|----------|--------------|-------------------|-------------------|------------------|-----------------------|------------------------|----------|
| MG1     | HCHC        | High       | High     | 100          | Illumina          | Even              | 300M             | 100                   | 29,714,584,400         | 0.998225 |
| MG2     |             |            |          |              |                   | Log-normal        |                  | 100                   |                        |          |
| MG3     | HCHC        | High       | High     | 251          | Illumina          | Even              | 300M             | 100                   | 29,714,802,400         | 0.999113 |
| MG4     |             |            |          | 250          |                   | Log-normal        |                  | 100                   |                        |          |
| MG5     | HCHC        | High       | High     | 322          | Illumina          | Even              | 300M             | 100                   | 29,714,761,200         | 0.999113 |
| MG6     |             |            |          | 403          |                   | Log-normal        |                  | 100                   |                        |          |
| MG7     | HCMC        | High       | Medium   | 100          | Illumina          | Even              | 1M               | 89                    | 88,642,935             | 0.996451 |
| MG8     |             |            |          |              |                   |                   |                  | 89                    | 88,628,116             | 0.996451 |
| MG9     | LCLC        | Low        | Low      | 25           | Illumina          | Log-normal        | 250k             | 89                    | 22,151,627             | 0.998225 |
| MG10    |             |            |          |              |                   |                   |                  | 89                    | 22,157,912             | 0.999113 |
| MG11    |             |            |          |              |                   |                   |                  | 89                    | 22,159,621             | 0.995563 |
| MG12    |             |            |          |              |                   |                   |                  | 89                    | 22,149,068             | 0.995563 |
| MG13    |             |            |          |              |                   |                   |                  | 89                    | 22,169,311             | 0.995563 |
| MG14    |             |            |          |              |                   |                   |                  | 89                    | 22,151,916             | 0.994676 |
| MG15    |             |            |          |              |                   |                   |                  | 89                    | 22,159,780             | 0.994676 |
| MG16    |             |            |          |              |                   |                   |                  | 89                    | 22,166,184             | 0.998225 |
| MG17    | LCLC        | Low        | Low      | 20           | Illumina          | Even              | 6,562,065        | 75                    | 492,154,875            | 0.996451 |
| MG18    |             |            |          |              |                   | Stag              | 7,932,819        | 75                    | 594,961,425            | 0.997338 |
| MG19    | LCLC        | Low        | Low      | 20           | 454               | Even              | 1,386,198        | 534                   | 740,531,674            | 0.999113 |
| MG20    |             |            |          |              |                   | Stag              | 1,225,169        | 533                   | 653,060,044            | 0.999113 |

**Supplementary Table 2. Community profiling tools used in this study**

| Tool        | Version     | Threads Used | Input Data | Input size (reads) | Options                         | Native Cutoff                                                           | Post-processing      | Taxonomy Level Used | Capable |
|-------------|-------------|--------------|------------|--------------------|---------------------------------|-------------------------------------------------------------------------|----------------------|---------------------|---------|
| GOTTCHA     | 1           | 12           | all        | all                | BWA mem                         | >= 10 reads,<br>>= 100 bp,<br>>= 0.5% signatures                        | none                 | species             | strain  |
| BLASTn      | 2.2.28+     | 12           | Fecal RNA  | 1M read subsample  | default                         | > 10 E-value                                                            | LCA with >= 10 reads | species             | strain  |
|             |             |              | all others | all                |                                 |                                                                         |                      | species             | strain  |
| BWA         | 0.7.4-r385  | 12           | all        | all                | aln/samse                       | <= 1 gap opening,<br><=2 mismatches in seed,<br>< 4% missing alignments | >= 10 reads          | species             | strain  |
| MetaPhlan   | 1.7.7       | 12           | all        | all                | default (bowtie2)               | > 10Kbp marker genes,<br>>1 quantile                                    | none                 | species             | species |
| mOTUs       | 1           | 12           | all        | all                | default                         | < 97% identity,<br>< 45bp reads                                         | none                 | species             | species |
| Kraken-mini | 0.10.2-beta | 12           | all        | all                | default with preloaded database | keep most weighted path                                                 | none                 | species             | strain  |

**Supplementary Figure 1. Filtering parameter selection using F-score as a function of linear coverage across multiple synthetic metagenomes of varying coverage.** An optimal value of linear coverage was selected by overlapping the F-score profiles of the two HCHC metagenomes (MG1, MG2), the two HCMC metagenomes (MG7, MG8), and the eight LCLC metagenomes (MG9-MG16), and selecting a region where the F-scores were maximal. (A) F-score across the full range of linear coverage: 0 – 100%. (B) Close-up of linear coverage in the range of 0.0 – 1.0%. The shaded region reflects a range of linear coverages (0.1 – 0.5%) that yield an optimal F-score across the datasets tested.

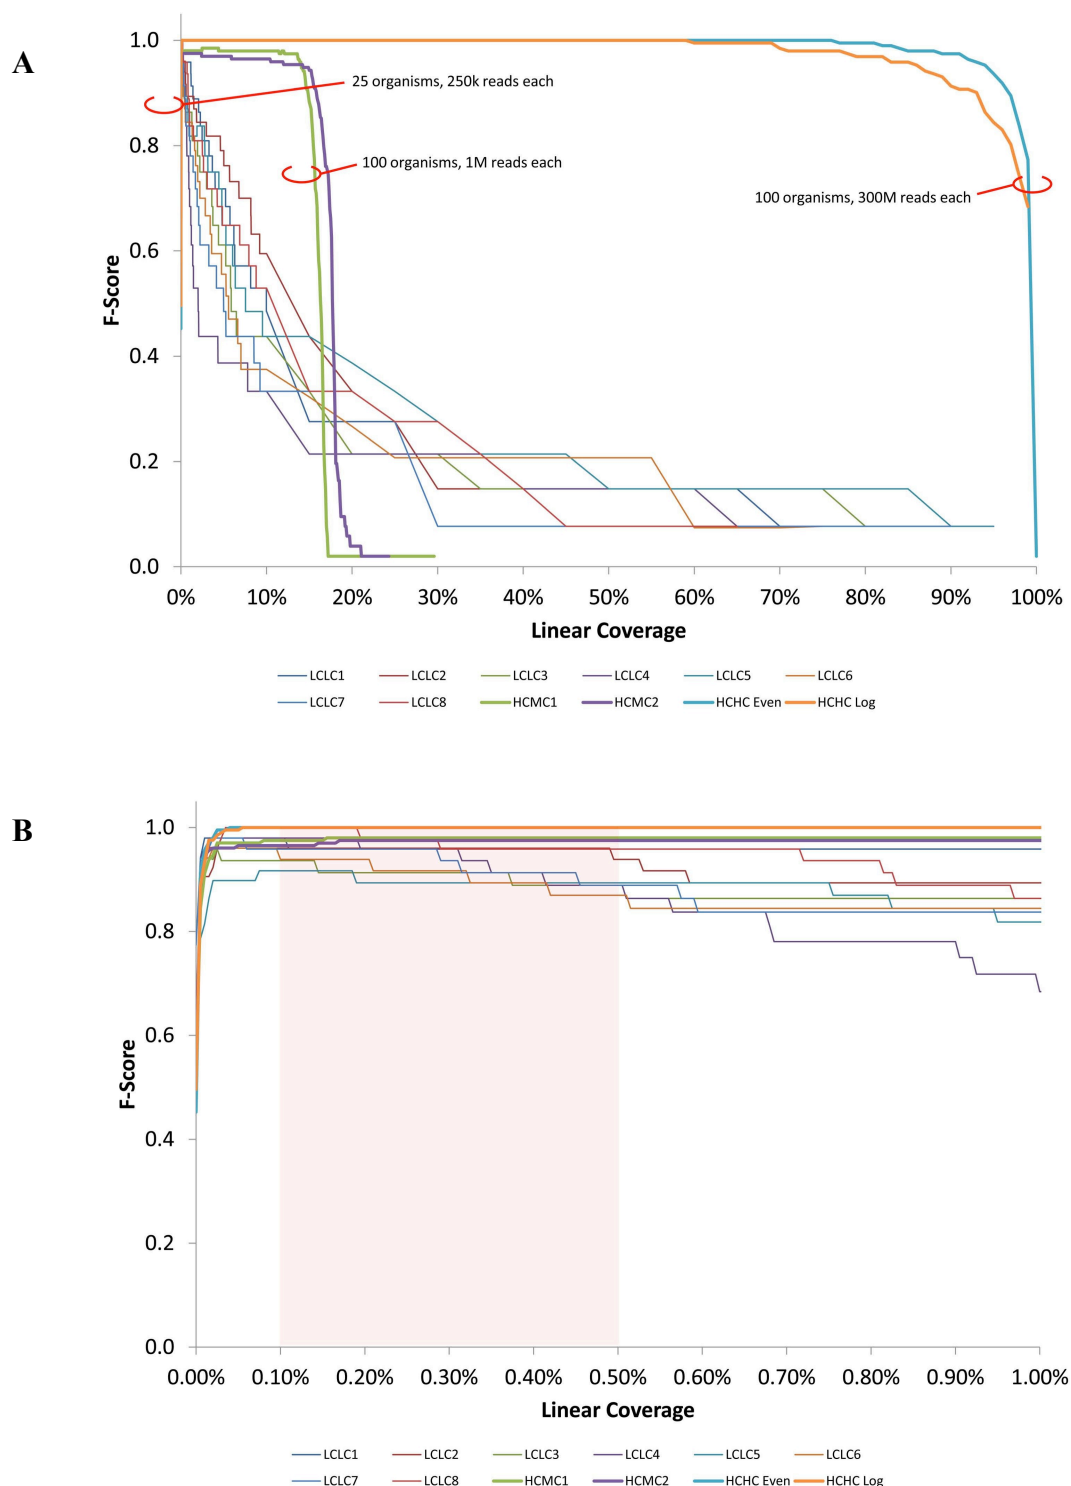

**Supplementary Figure 2. GOTTCHA precision-recall curves for two high-complexity (MG7-MG8) and eight low-complexity (MG9-MG16) synthetic metagenomes and their associated F-scores.** Precision and recall values were determined and plotted for each synthetic metagenome (solid lines) throughout the entire range of linear coverages (0 – 100%). For comparison, the precision and recall values for random guessing are shown (dashed line). The range of linear coverages yielding optimal F-scores across all HCHC, HCMC, and LCLC datasets (shaded pink regions) is shown for (A) the high complexity, medium coverage (HCMC: MG7-MG8) and (B) low complexity, low coverage (LCLC: MG9-MG16) synthetic metagenomes: 0.1% (green-filled marker) to 0.5% (red-filled marker). (C) Each tool’s classification performance in terms of the F-score.

**2A**

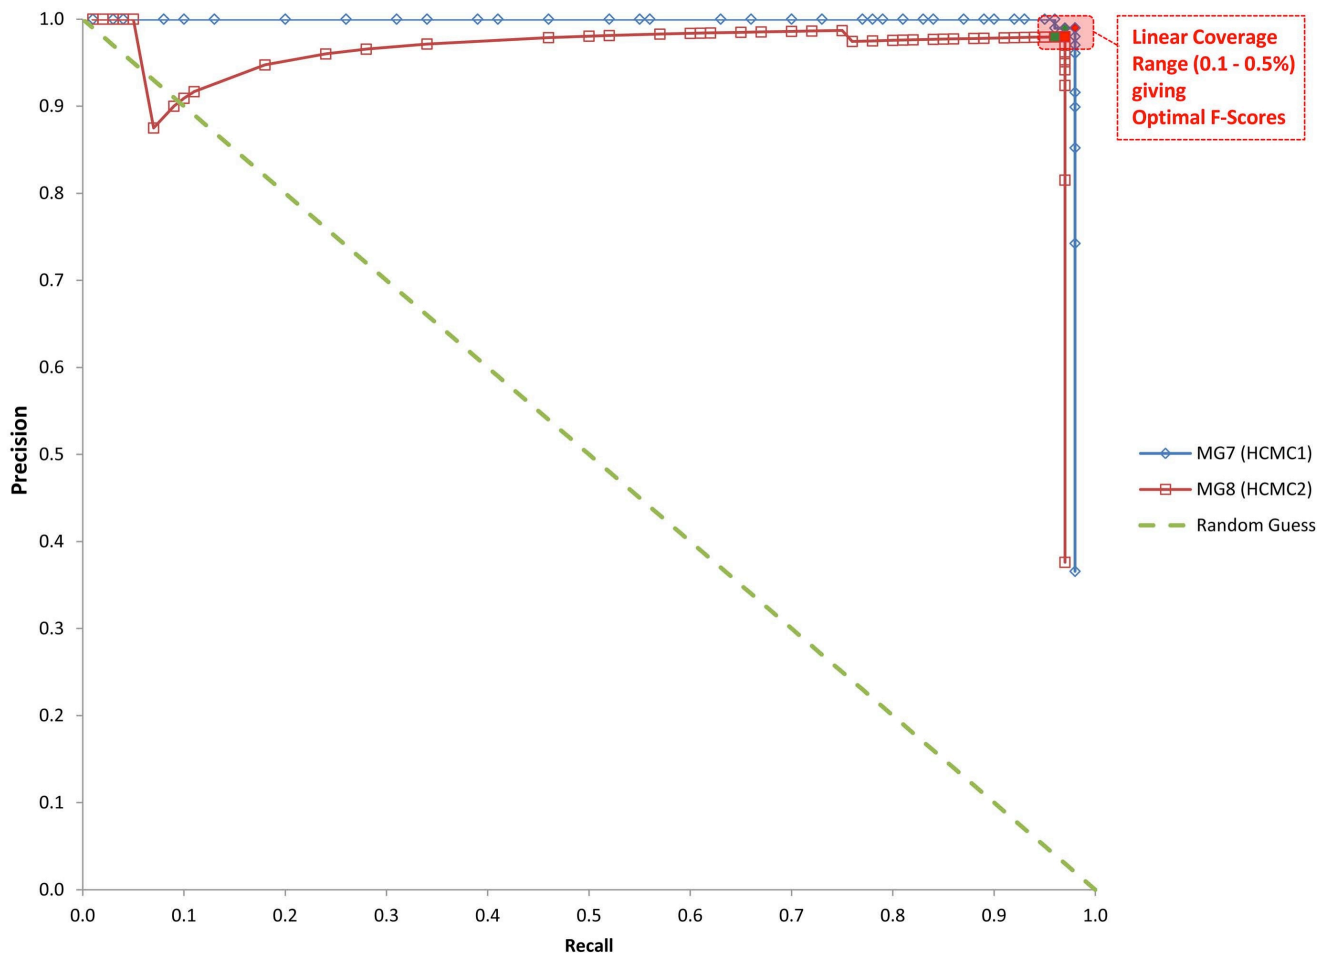

# 2B

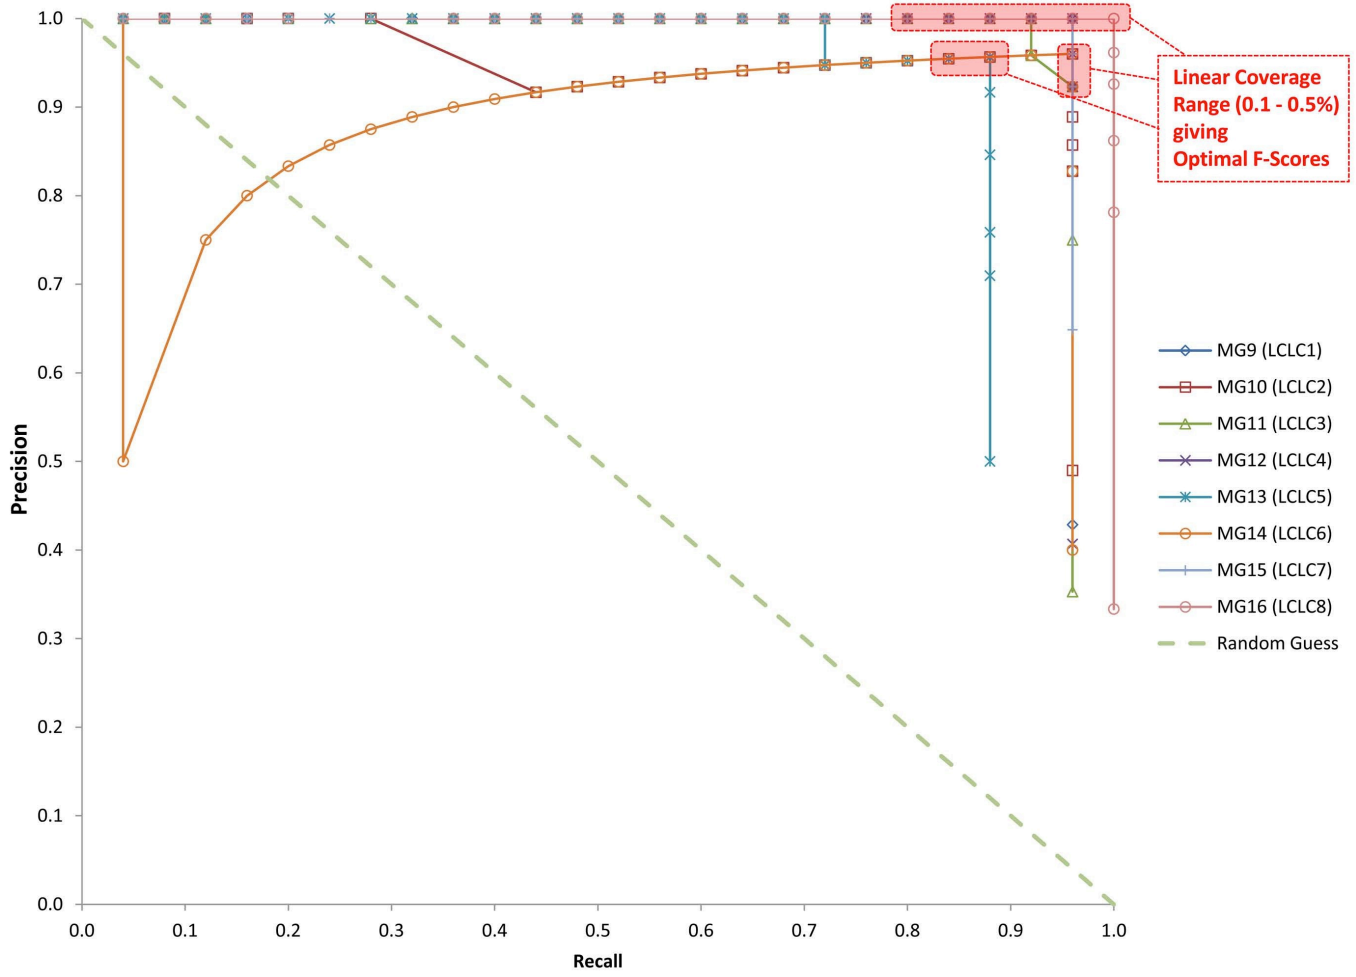

## 2C

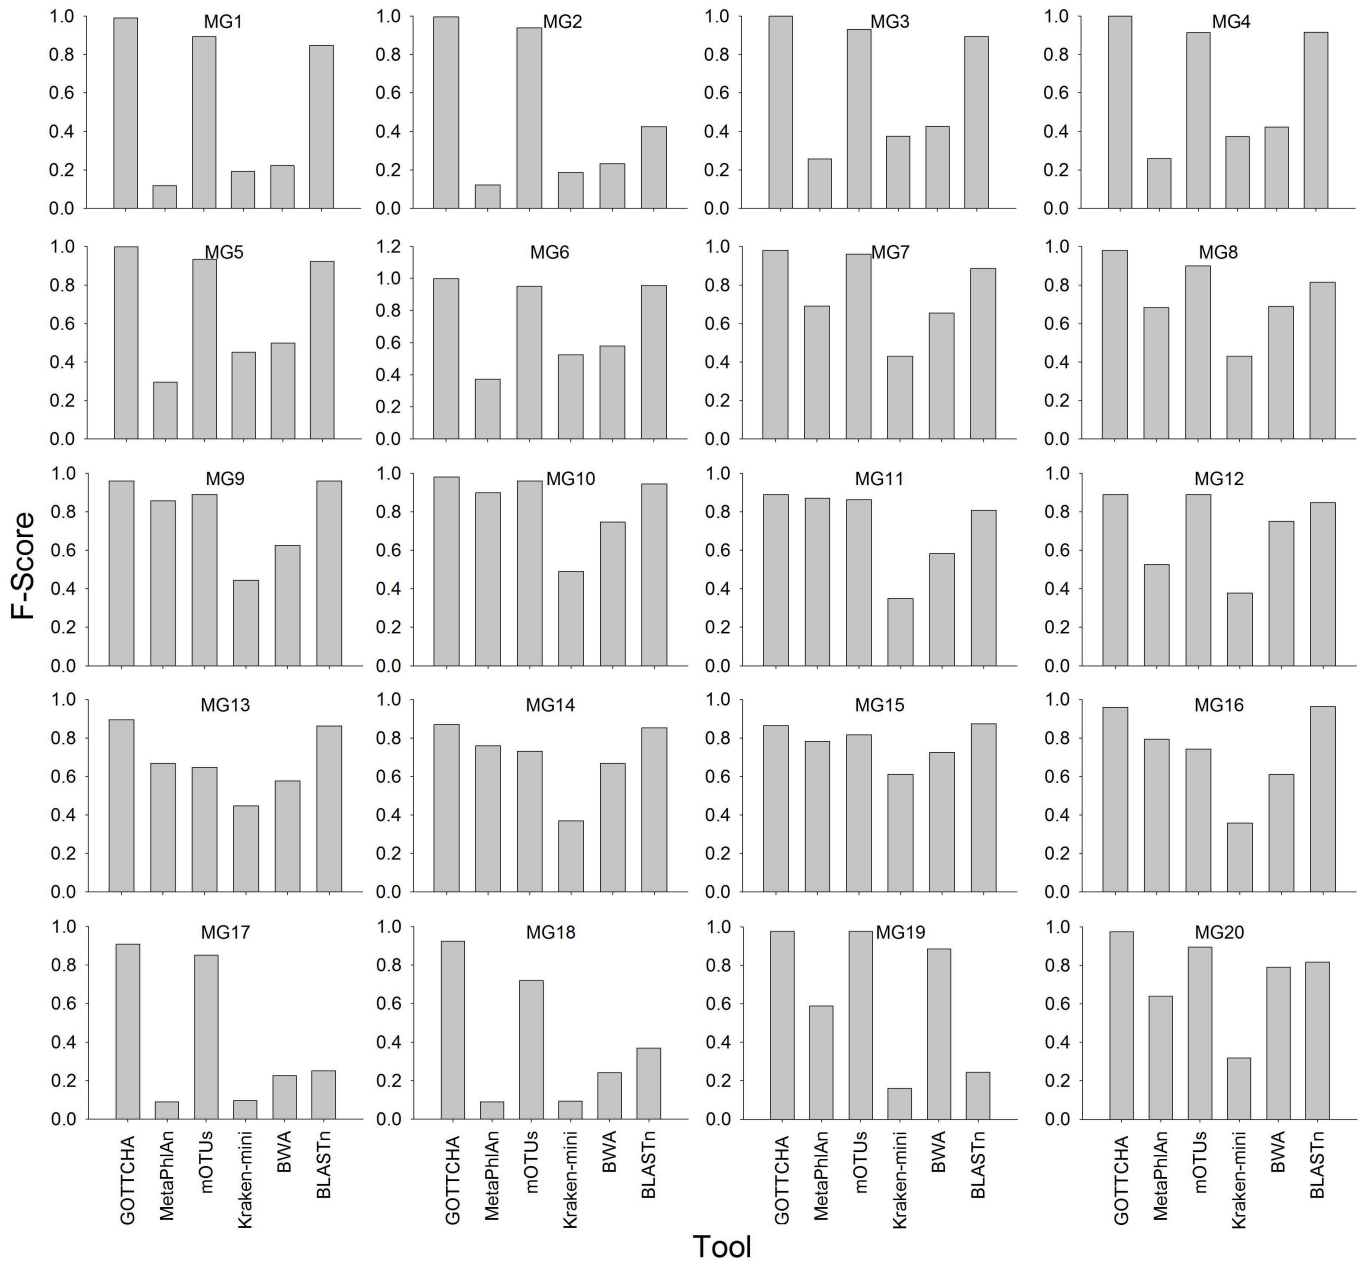

**Supplementary Figure 3. Hierarchical capture of genomic content from 100 randomly selected genomes.** (A) Fraction of all reads extractable from the 100 randomly selected genomes that could be mapped back to the tool-specific references, regardless of correctness, and organized by taxonomic level. Each data point represents the reported fraction of a single genome. (B) Fraction of the classified reads that were correctly assigned. (C) Fraction of the classified reads that was incorrectly assigned. The median (solid bar), interquartile range (boxes: 25%-75%), range without outliers (whiskers), and outliers (open circles) are shown. The full list of 100 selected genomes is provided in **Supplementary List 1**.

3A

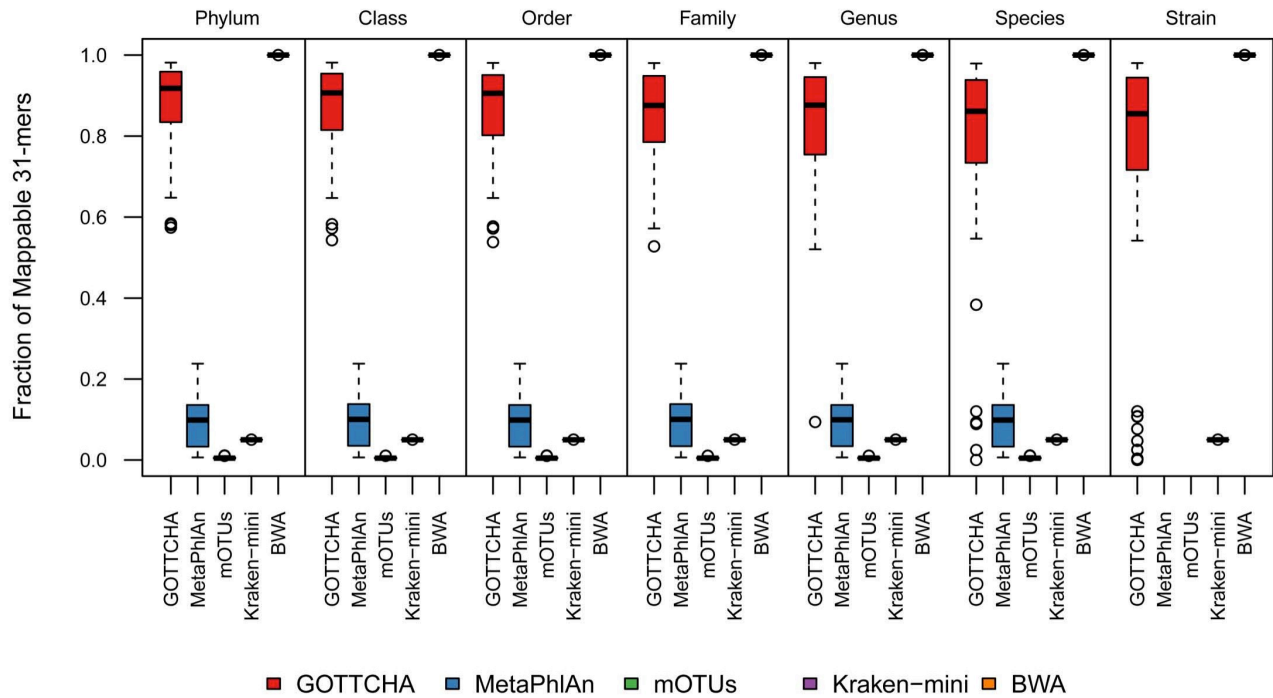

### 3B

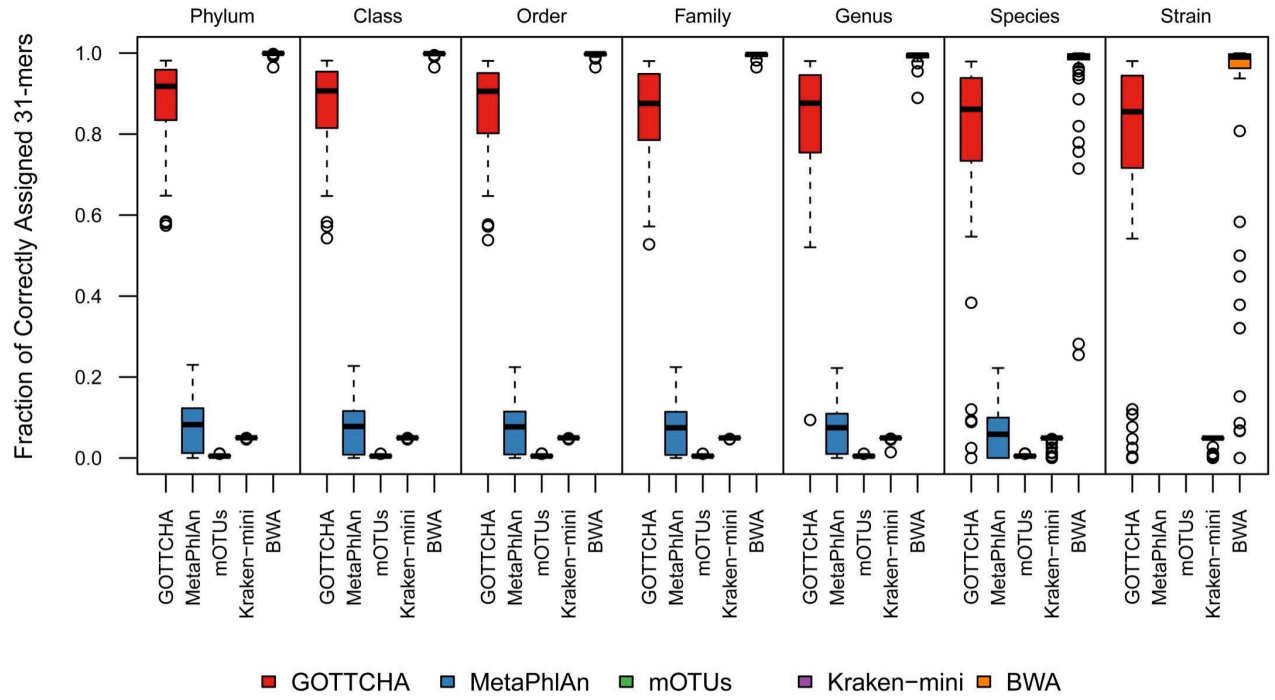

### 3C

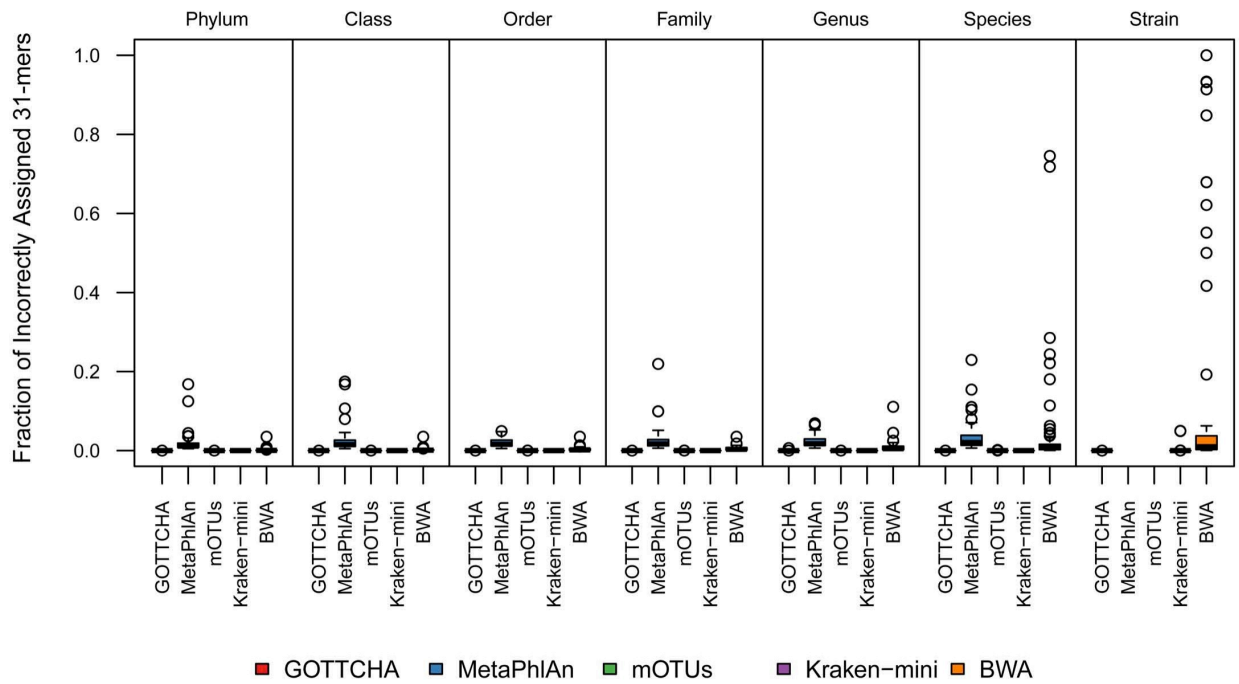

**Supplementary Figure 4. Classification and relative abundance predictions for four additional high complexity, high coverage (HCHC) synthetic metagenomes.** Two communities with >200 organisms: The EVEN community (*A*) classification and (*B*) relative abundances; and the LOG-NORMAL community (*C*) classification and (*D*) relative abundances. Two communities with >300 organisms: The EVEN community (*E*) classification and (*F*) relative abundances; and the LOG-NORMAL community (*G*) classification and (*H*) relative abundances.

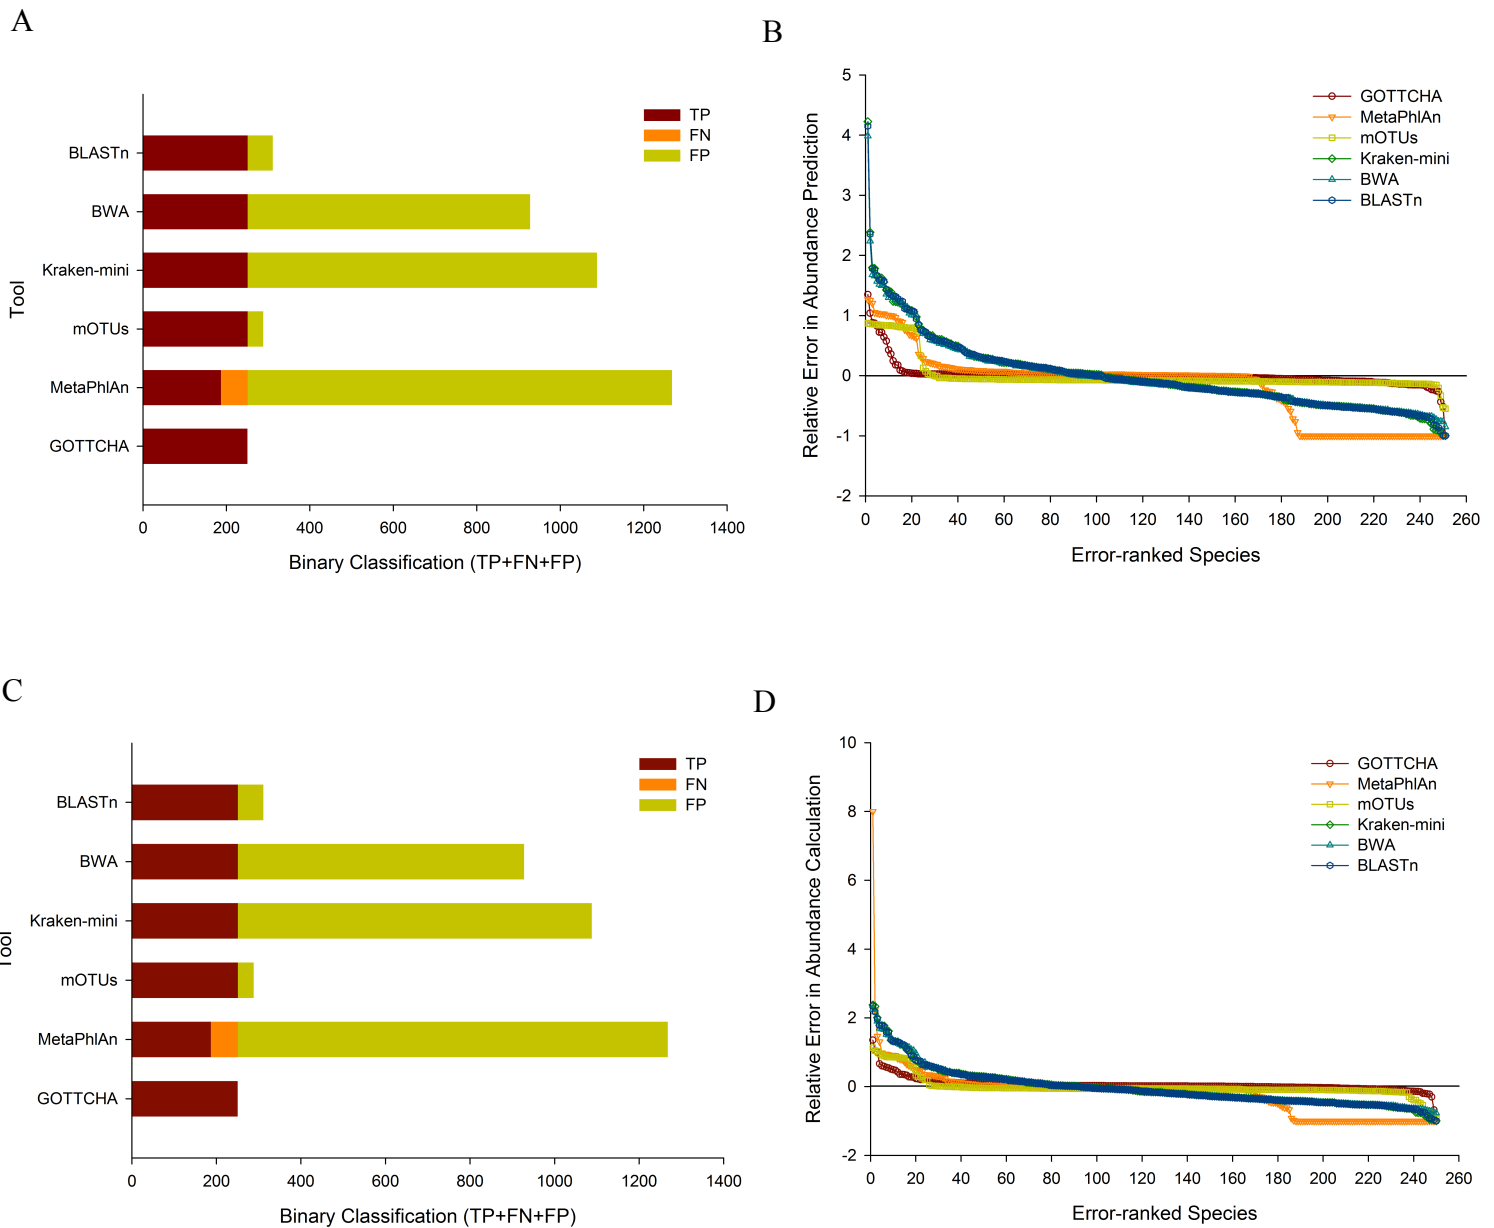



E

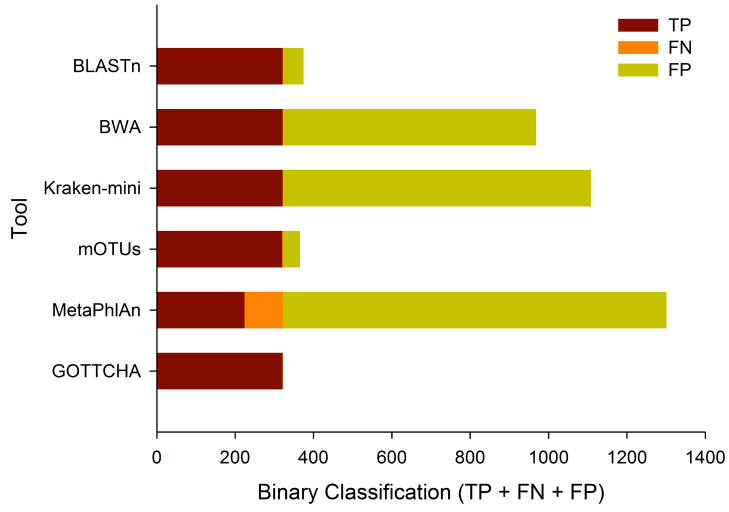

F

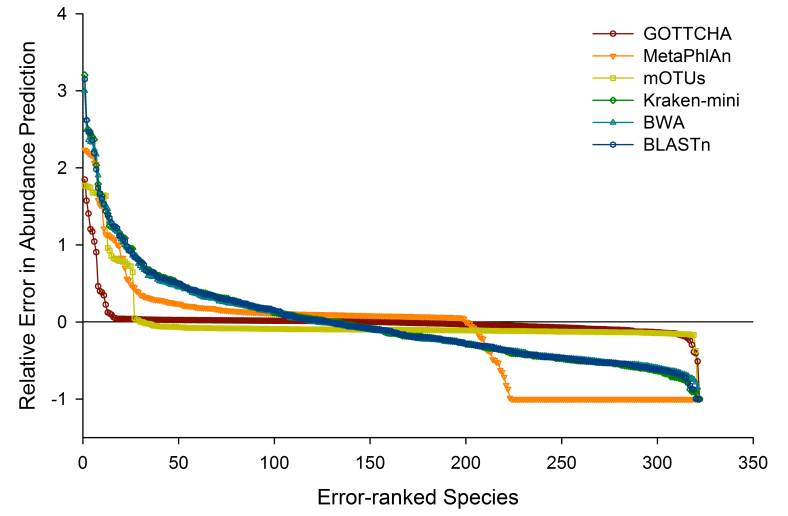

G

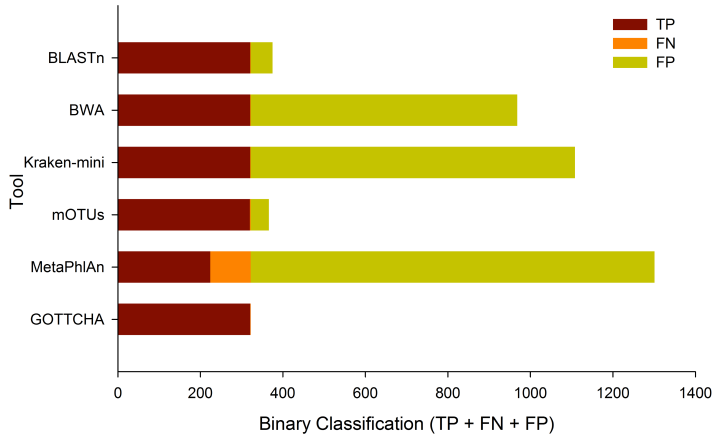

H

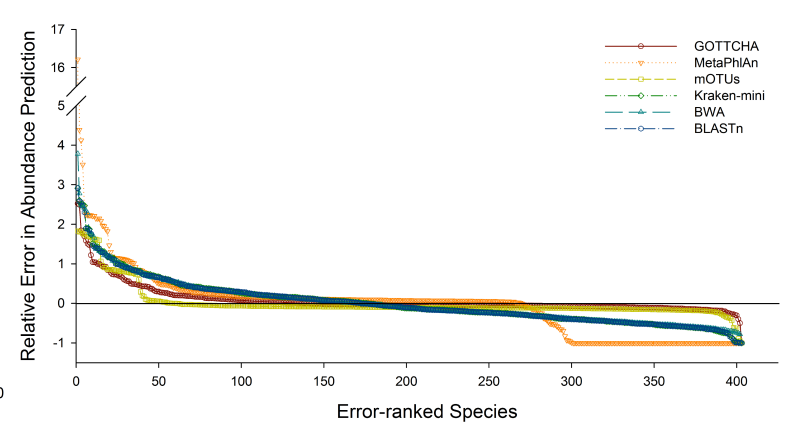

**Supplementary Figure 5. Classification and relative abundance predictions for two high complexity, medium coverage (HCMC) synthetic metagenomes (MG7-MG8).** Species classification (A) and relative abundance comparisons (B) of MG7 and MG8. Both metagenomes consist of 1M reads distributed evenly among 100 organisms.

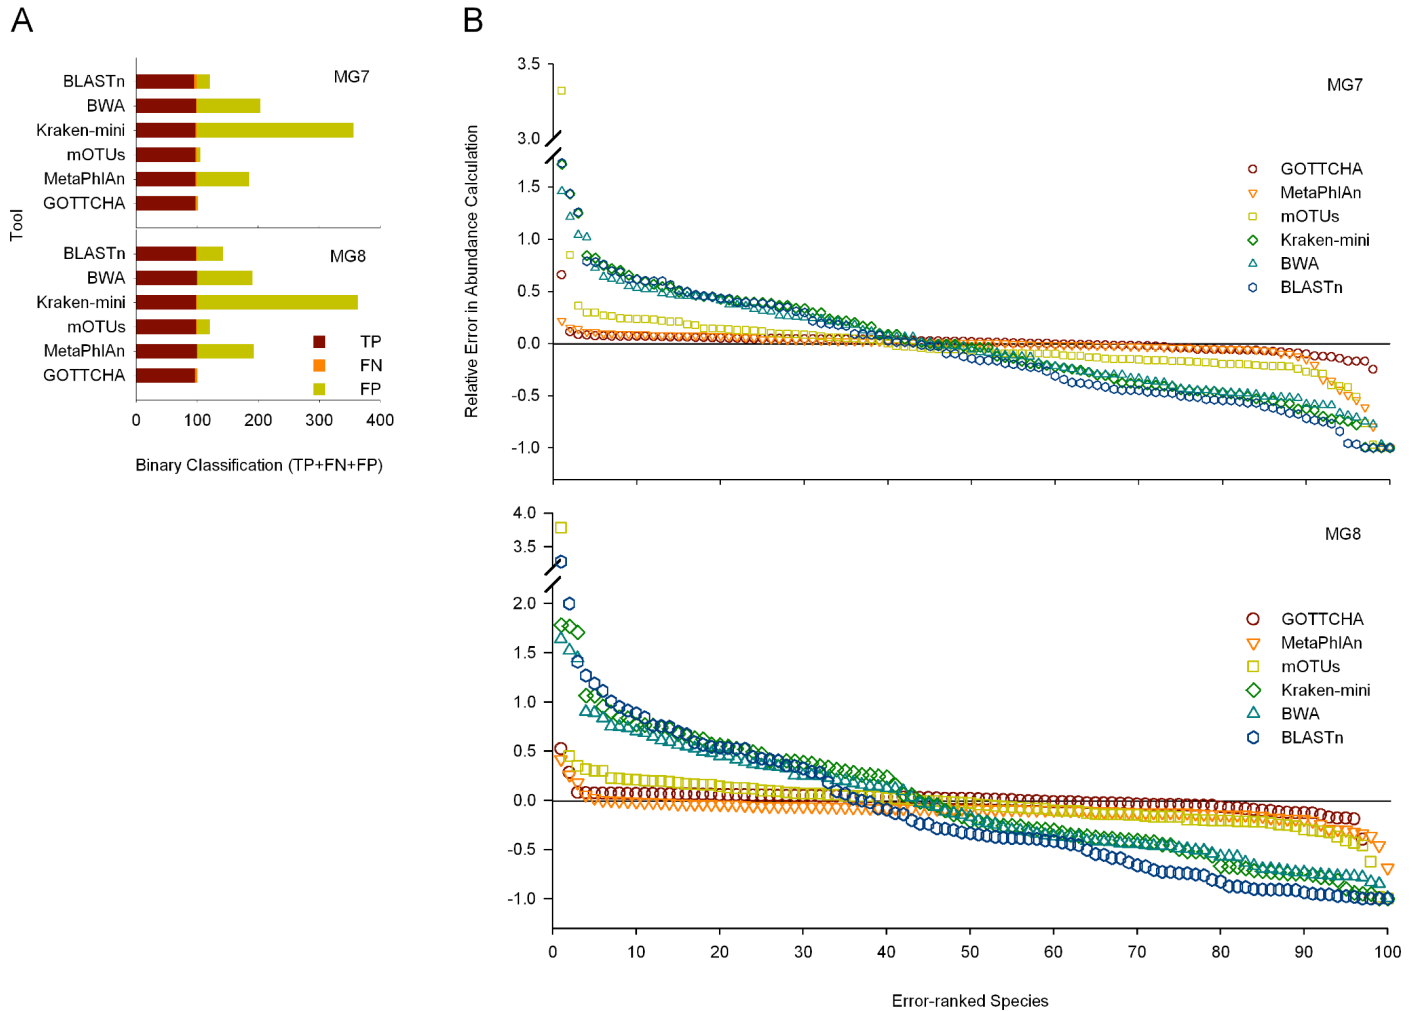

**Supplementary Figure 6. Classification of eight low complexity, low coverage (LCLC) synthetic metagenomes (MG9-MG16).** Species classification comparisons of MG9 – MG16. Each metagenome consists of 250k reads of mean length 89-bp log-normally distributed among 25 organisms.

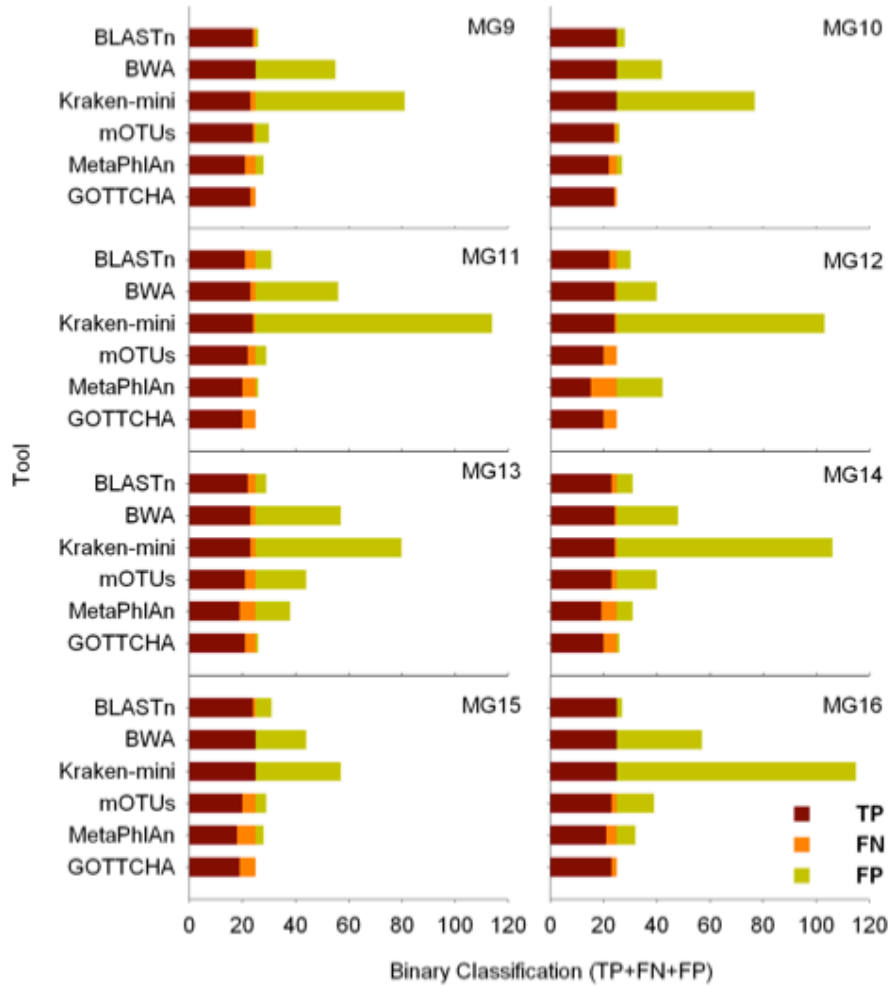

**Supplementary Figure 7. Identification of the pathogen, *Francisella tularensis*, spiked in an environmental (air filter) microbiome sample.** The environmental metagenome of an air filter spiked with *F. tularensis* (†) was profiled with GOTTCHA, MetaPhlAn, mOTUs, Kraken, BWA, and BLASTn. The range of organisms identified in the heat map was ordered and truncated down to the 83 bacteria identified by GOTTCHA. Relative abundances range from  $3.1 \times 10^{-5}$  (black) to 0.031 (red), while grey cells indicate absence.

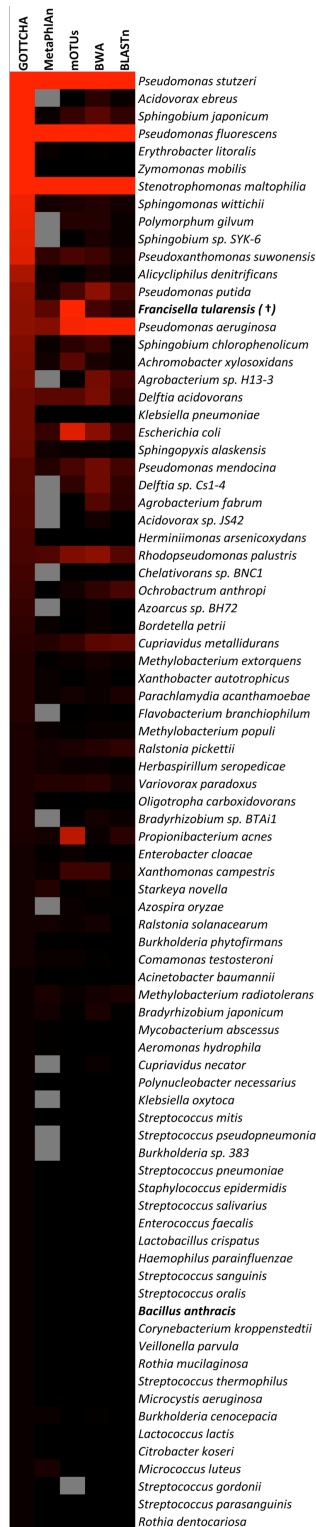

**Supplementary Figure 8. Classification of 1849 novel draft genomes at various taxonomic hierarchies.** Draft genomes without representation at the *Strain*, *Species*, *Genus*, *Family*, or *Class* levels were assigned to their parent taxa using the GOTTCHA workflow.

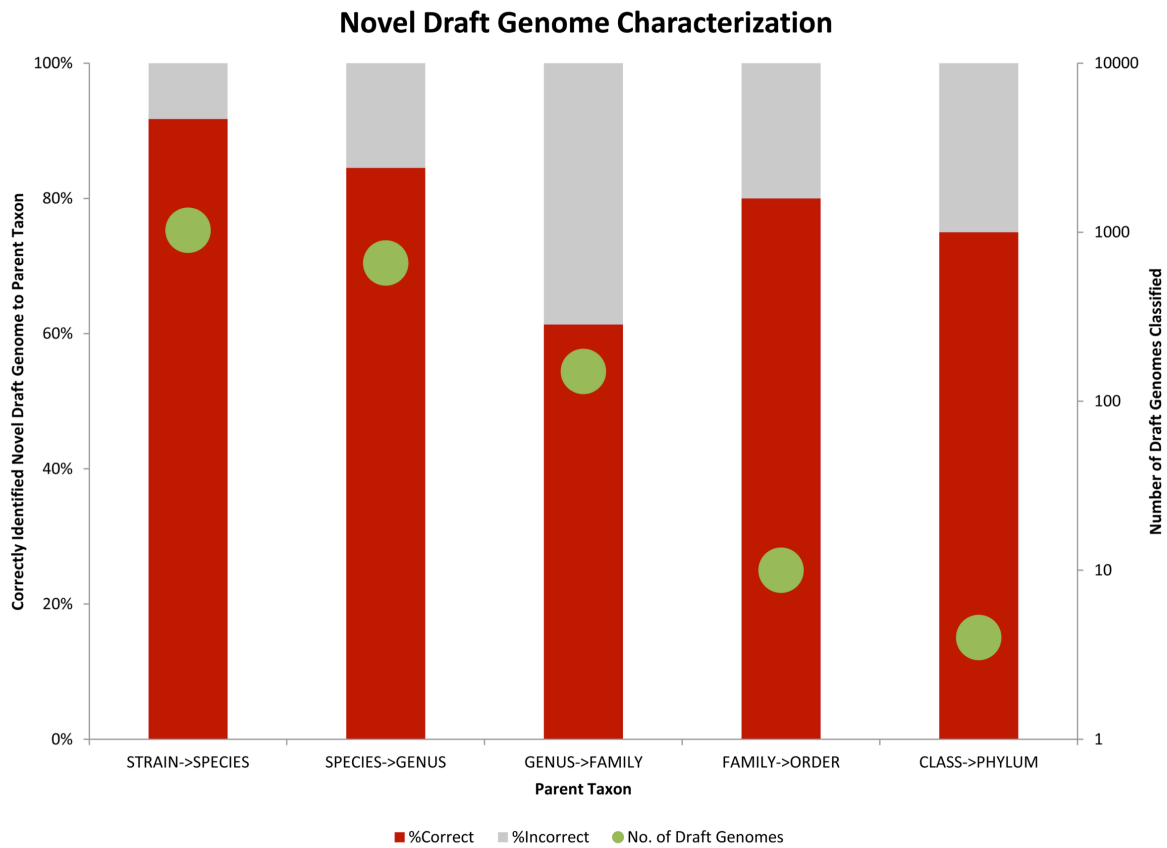

**Supplementary Figure 9. Community profiling computational performance of the six tools on the four HMP mock datasets. (A) Processing rate and (B) RAM usage.**

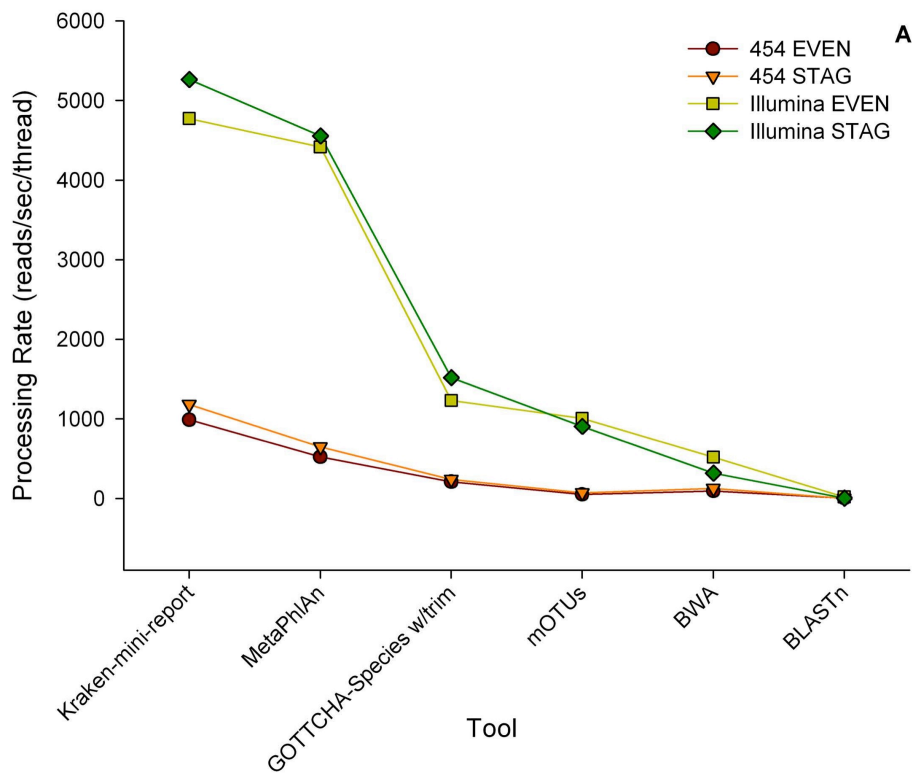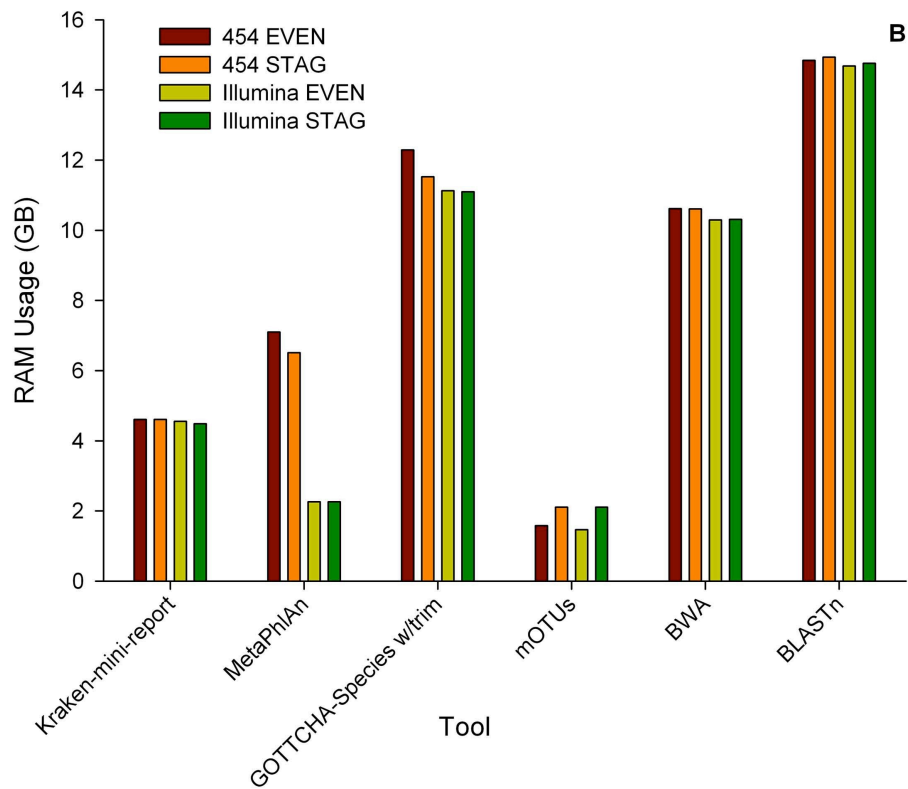

### Supplementary List 1. List of the 100 genomes used in Supplementary Figure 3

Acaryochloris\_marina\_MBIC11017\_uid58167  
Acetobacterium\_woodii\_DSM\_1030\_uid88073  
Acetohalobium\_arabaticum\_DSM\_5501\_uid51423  
Acinetobacter\_baumannii\_ATCC\_17978\_uid58731  
Actinosynnema\_mirum\_DSM\_43827\_uid58951  
Aeromonas\_salmonicida\_A449\_uid58631  
Agrobacterium\_H13\_3\_uid63403  
Alteromonas\_macleodii\_Deep\_ecotype\_uid58251  
Aminobacterium\_colombiense\_DSM\_12261\_uid47083  
Anoxybacillus\_flavithermus\_WK1\_uid59135  
Azorhizobium\_caulinodans\_OR5\_571\_uid58905  
Bacteriovorax\_marinus\_SJ\_uid82341  
Bartonella\_clarridgeiae\_73\_uid62131  
Beijerinckia\_indica\_ATCC\_9039\_uid59057  
Brevundimonas\_subvibrioides\_ATCC\_15264\_uid42117  
Brucella\_suis\_ATCC\_23445\_uid59015  
Burkholderia\_pseudomallei\_K96243\_uid57733  
Caulobacter\_segneri\_ATCC\_21756\_uid41709  
Cellulophaga\_lytica\_DSM\_7489\_uid63401  
Chitinophaga\_pinensis\_DSM\_2588\_uid59113  
Collimonas\_fungivorans\_Ter331\_uid70793  
cyanobacterium\_UCYN\_A\_uid43697  
Cyclobacterium\_marinum\_DSM\_745\_uid71485  
Cytophaga\_hutchinsonii\_ATCC\_33406\_uid57651  
Deinococcus\_maricopensis\_DSM\_21211\_uid62225  
Hydrogenobaculum\_Y04AAS1\_uid58857  
Hyphomonas\_neptunium\_ATCC\_15444\_uid58433  
Jannaschia\_CCS1\_uid58147  
Laribacter\_hongkongensis\_HLHK9\_uid59265  
Leadbetterella\_byssophila\_DSM\_17132\_uid60161  
Mahella\_australiensis\_50\_1\_BON\_uid66917  
Marinithermus\_hydrothermalis\_DSM\_14884\_uid65783  
Methanobrevibacter\_smithii\_ATCC\_35061\_uid58827  
Methanocella\_paludicola\_SANAE\_uid42887  
Methanohalophilus\_mahii\_DSM\_5219\_uid47313  
Methylocella\_silvestris\_BL2\_uid59433  
Methylovorus\_MP688\_uid60723  
Moorella\_thermoacetica\_ATCC\_39073\_uid58051  
Nakamurella multipartita\_DSM\_44233\_uid59221  
Nitrobacter\_hamburgensis\_X14\_uid58293  
Nocardioides\_JS614\_uid58149  
Orientia\_tsutsugamushi\_Boryong\_uid61621  
Pantoea\_ananatis\_uid86861  
Paracoccus\_denitrificans\_PD1222\_uid58187  
Pelobacter\_propionicus\_DSM\_2379\_uid58255  
Polynucleobacter\_necessarius\_asymbioticus\_QLW\_P1DMWA\_1\_uid58611  
Prochlorococcus\_marinus\_MIT\_9515\_uid58313  
Pyrococcus\_yayanosii\_CH1\_uid68281  
Pyrolobus\_fumarum\_1A\_uid73415  
Rubrobacter\_xylanophilus\_DSM\_9941\_uid58057  
Desulfarculus\_baarsii\_DSM\_2075\_uid51371  
Desulfatibacillum\_alkenivorans\_AK\_01\_uid58913  
Desulfurobacterium\_thermolithotrophum\_DSM\_11699\_uid63405  
Dichelobacter\_nodosus\_VCS1703A\_uid57643  
Dickeya\_dadantii\_Ech586\_uid42519  
Elusimicrobium\_minutum\_Pei191\_uid58949  
Erythrobacter\_litoralis\_HTCC2594\_uid58299  
Escherichia\_coli\_O157\_H7\_Sakai\_uid57781  
Ethanoligenens\_harbinense\_YUAN\_3\_uid46255  
Eubacterium\_limosum\_KIST612\_uid59777  
Ferrimonas\_balearica\_DSM\_9799\_uid53371  
Fluviicola\_taffensis\_DSM\_16823\_uid65271  
Gallibacterium\_anatis\_UMN179\_uid66567  
Gardnerella\_vaginalis\_409\_05\_uid43211  
Geobacillus\_Y412MC61\_uid41171  
Glaciecola\_nitratireducens\_FR1064\_uid73759  
Gordonia\_bronchialis\_DSM\_43247\_uid41403  
Granulicella\_mallensis\_MP5ACTX8\_uid49957  
Halogeometricum\_borinquense\_DSM\_11551\_uid54919  
Halomicrobium\_mukohataei\_DSM\_12286\_uid59107  
Halopiger\_xanaduensis\_SH\_6\_uid68105  
Halorhodospira\_halophila\_SL1\_uid58473  
Halorubrum\_lacusprofundi\_ATCC\_49239\_uid58807  
Halothermothrix\_oreni\_H\_168\_uid58585  
Halothiobacillus\_neapolitanus\_c2\_uid41317  
Segniliparus\_rotundus\_DSM\_44985\_uid49049  
Simkania\_negevensis\_Z\_uid68451  
Sphingobium\_chlorophenolicum\_L\_1\_uid52597  
Sphingopyxis\_alaskensis\_RB2256\_uid58351  
Staphylococcus\_pseudintermedius\_HKU10\_03\_uid62125  
Starkeya\_novella\_DSM\_506\_uid48815  
Sulfobacillus\_acidophilus\_TPY\_uid68841  
Sulfurospirillum\_deleyianum\_DSM\_6946\_uid41861  
Synechococcus\_WH\_7803\_uid61607  
Tannerella\_forsythia\_ATCC\_43037\_uid83157  
Terriglobus\_saanensis\_SP1PR4\_uid53251  
Tetragenococcus\_halophilus\_uid74441  
Thermaerobacter\_marianensis\_DSM\_12885\_uid61727  
Thermobifida\_fusca\_YX\_uid57703  
Thermodesulfobacterium\_OPB45\_uid68283  
Thermodesulfobium\_narugense\_DSM\_14796\_uid66601  
Thermodesulfovibrio\_yellowstonii\_DSM\_11347\_uid59257  
Thermoproteus\_tenax\_Kra\_1\_uid74443  
Thermovirga\_lienii\_DSM\_17291\_uid77129  
Thermus\_scotoductus\_SA\_01\_uid62273  
Thiobacillus\_denitrificans\_ATCC\_25259\_uid58189  
Veillonella\_parvula\_DSM\_2008\_uid41927  
Waddlia\_chondrophila\_WSU\_86\_1044\_uid49531  
Yersinia\_enterocolitica\_palaearctica\_105\_5R\_r\_uid63663  
Yersinia\_pestis\_CO92\_uid57621
